# Supplementary material
Source: PubMed Central journal article supplement (PMC3897247)

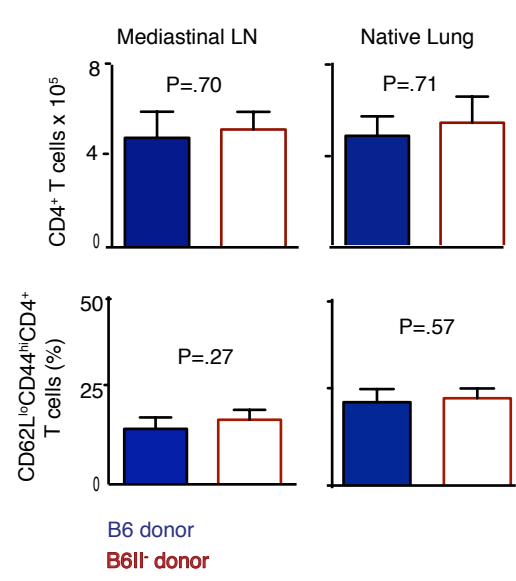

Supplemental Figure 1 Kreisel et al.

Supplement: NIHMS543830-supplement-1.pdf [file NIHMS543830-supplement-1.pdf]

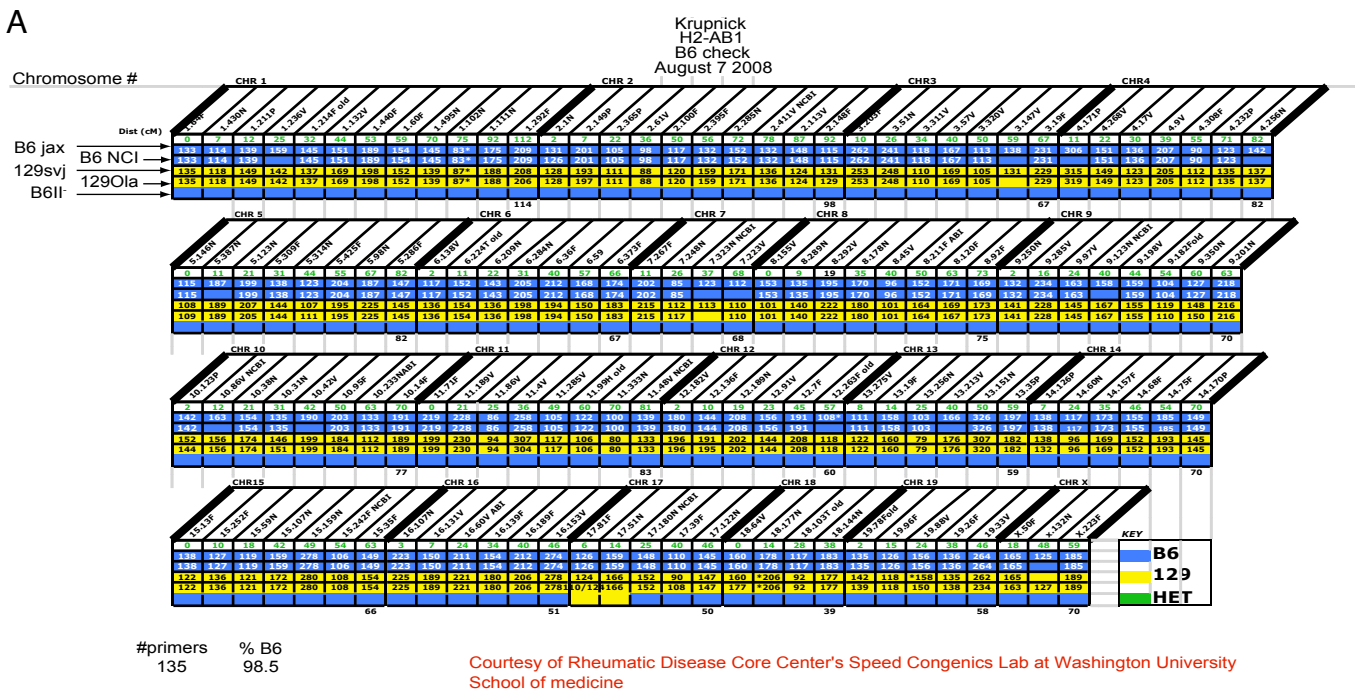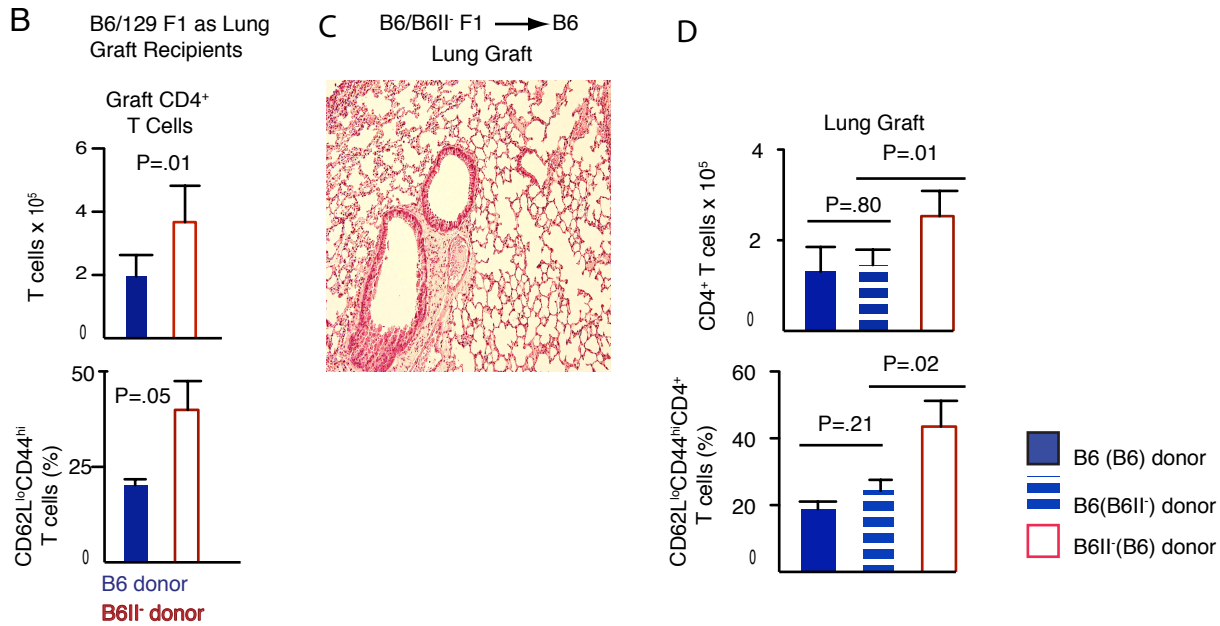

Supplemental Figure 2 Kreisel et al.

Supplement: NIHMS543830-supplement-2.pdf [file NIHMS543830-supplement-2.pdf]

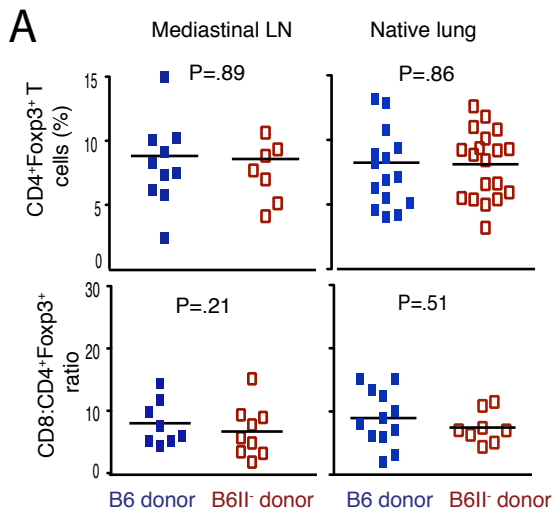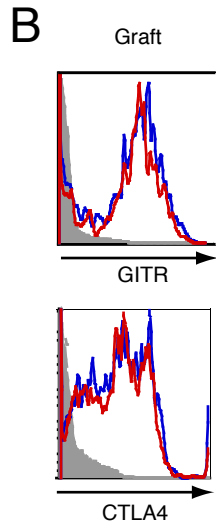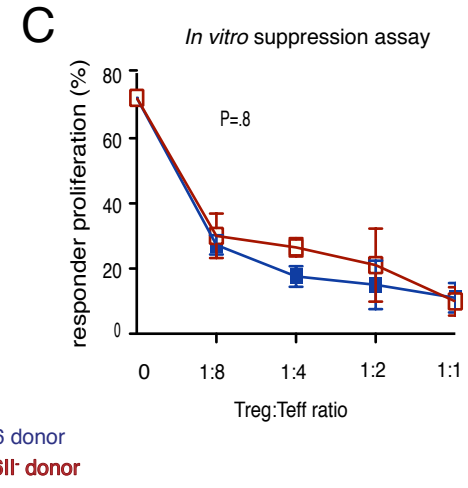

**Supplemental Figure 3 Kreisel et al.**

Supplement: NIHMS543830-supplement-3.pdf [file NIHMS543830-supplement-3.pdf]

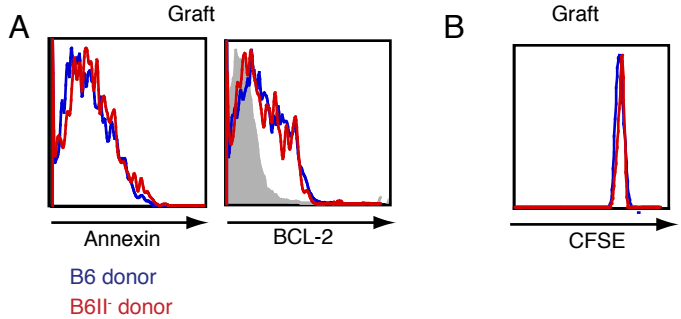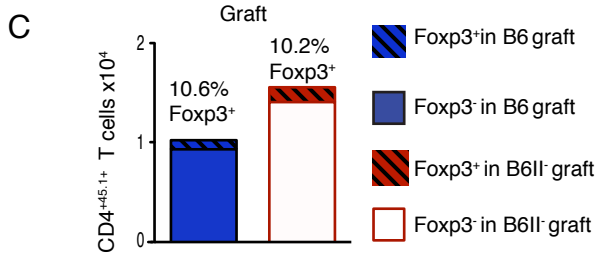

**Supplemental Figure 4 Kreisel et al.**

Supplement: NIHMS543830-supplement-4.pdf [file NIHMS543830-supplement-4.pdf]
